# Supplementary material for: Cash for COVID-19 Vaccines in Africa: A Financial Incentives Trial in Rural Ghana
Source: Research Square preprint supplement (doi:10.21203/rs.3.rs-2845647/v1), 2023-05-02
Supplement: Supplementary file 1 [file 5de4bff33b6ea102ba7aedb7.docx]

1. Has the research included local researchers throughout the research process – study design, study implementation, data ownership, intellectual property and authorship of publications?
   - The initial concept of a Ghana COVID-19 Vaccine Incentive research project was the product of conversations between Professor Asiedu (University of Ghana) and Ray Duch (University of Oxford) – Asiedu and Duch have been working together for numerous years on field experiment projects in Ghana. The actual study design – including, most importantly, selection of target population, sampling strategy, the video treatments, financial incentives and vaccination outcome measures – was developed in close collaboration with Professor Asiedu and his PhD student, Dorcas Sowah. All of the data and intellectual property associated with the project are shared with Professor Asiedu and the University of Ghana. Both Professor Asiedu and Ms. Sowah are co-authors on resulting publications.
2. Is the research locally relevant and has this been determined in collaboration with local partners?
   - Our local partners in the project are the Health District Offices in the six Regional Districts where the research was conducted. We were able to implement the Ghana COVID-19 Vaccine Incentive research project because our local partners considered it extremely relevant to the challenges faced in vaccinating their rural populations. More broadly though the goal of assessing whether financial incentives could significantly increase vaccine uptake was very much relevant for health policy makers in Ghana and Africa overall because of the relatively slow pace of vaccine uptake in the region. A number of leading policy makers advocated exploring the role that financial incentives could play – and there was very little evidence from Low and Middle Income countries regarding the impact such a policy might have.
   - In order to ensure the project design and roll-out incorporated maximum input from local partners, Ray Duch met regularly in person with the District Health officials to report the on-going results and to determine what changes in the design and implementation were necessary in order to ensure maximum local relevance of the study results. The local University of Ghana team and the other regional research teams met weekly in order to ensure again that our design and implementation was locally relevant.
3. Please describe whether roles and responsibilities were agreed amongst collaborators ahead of the research and whether any capacity-building plans for local researchers were discussed.
   - The roles and responsibilities amongst collaborators were agreed upon ahead of the research project. These were outlined in documents jointly prepared by the University of Ghana and University of Oxford teams – they included roles and responsibilities for the Ghana academic team; the Oxford academic team, the other regional academic teams, and the local Ghana health district teams. Capacity building was an important feature of the research implementation strategy. The project included support for capacity building at the individual Ghana Health District level; resources and funding for building the research infrastructure of the University of Ghana team (that includes a large team of student enumerators and researchers); and career development opportunities for the senior members of the University of Ghana research team.
4. Would this research have been severely restricted or prohibited in the setting of the researchers? If yes, please provide details on specific exceptions granted for this research in agreement with local stakeholders.
   - The research would not have been severely restricted or prohibited in the Ghana setting where the research took place. As we pointed out in our ethics submission to the University of Oxford, the treatments consisted only of encouragements for the treated subjects to get a COVID-19 vaccine. And all participants in the study were compensated for their participation.
5. Where appropriate, has the study been approved by a local ethics review committee? If not, please explain the reasons.
   - Because of time constraints, given the urgency of having our study go into the field as the COVID-19 vaccines were being distributed in our targeted rural districts, we opted for only a single high-intensity ethics review at the University of Oxford (CUREC 2). This was a joint decision of the local research team and the Oxford research team. Professor Asiedu from the University of Ghana was one of the co-PIs included in the University of Oxford ethics submission.
6. Where animal welfare regulations, environmental protection and bio risk-related regulations in the local research setting were insufficient compared to the setting of the researchers, please describe if research was undertaken to the higher standards.
   - These regulations and protection issues were not a consideration in this research study.
7. Does the research result in stigmatization, incrimination, discrimination or otherwise personal risk to participants? If yes, describe provisions to ensure safety and well- being of participants.
   - The research resulted in no stigmatization, incrimination discrimination or other personal risks to participants. Also, we adopted very strict measures to ensure the information we collected was anonymized and we follow strict University of Oxford procedures for data protection.
8. If research involves health, safety, security or other risk to researchers, describe any risk management plans undertaken.
   - The research was implemented during the COVID-19 pandemic, and we reviewed with local partners and Ghana district health officials the appropriate measures that needed to be put into place to protect both the enumerators who were conducting the interventions and the study participants. We have a detailed discussion of these measures in our ethics submission to the University of Oxford. Also, we provided detailed instructions to enumerators regarding COVID-19 symptoms and COVID-19 protection measures – these were provided in initial documents on the tablet surveys that were administered. Ray Duch also briefed enumerators in person on the necessary COVID-19 measures that needed to be adopted. Subjects were also provided with COVID-19 instructions – for example, they were questioned about COVID-19 symptoms; instructed regarding masking and social distancing.
9. Have any benefit sharing measures been discussed in case biological materials, cultural artefacts or associated traditional knowledge has been transferred out of the country?
   - These types of sharing opportunities did not result from this study.
10. Please indicate if you have taken local and regional research relevant to your study into account in citations.
    - In preparing the manuscript the authors were very careful to ensure that all local and regional research relevant to the study and its results were taken into account in citations.
